# Supplementary material
Source: publisher figshare collection journal article supplement (https://tandf.figshare.com/articles/dataset/_/1230086)
Supplement: Supplementary file 2 [file 2]

|  |           |         |           |
|--|-----------|---------|-----------|
|  |           |         |           |
|  | $\beta_1$ | $\beta$ | $\beta_2$ |
|  |           |         |           |
